# Supplementary figures and images for: Risperidone and aripiprazole alleviate prenatal valproic acid-induced abnormalities in behaviors and dendritic spine density in mice
Source: Springer Nature journal article supplement (doi:10.1007/s00213-017-4703-9), 2017-08-10

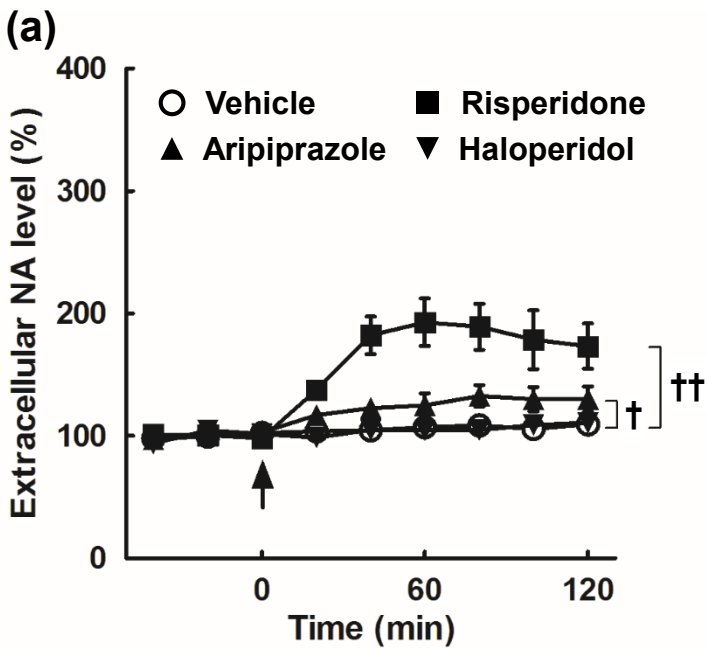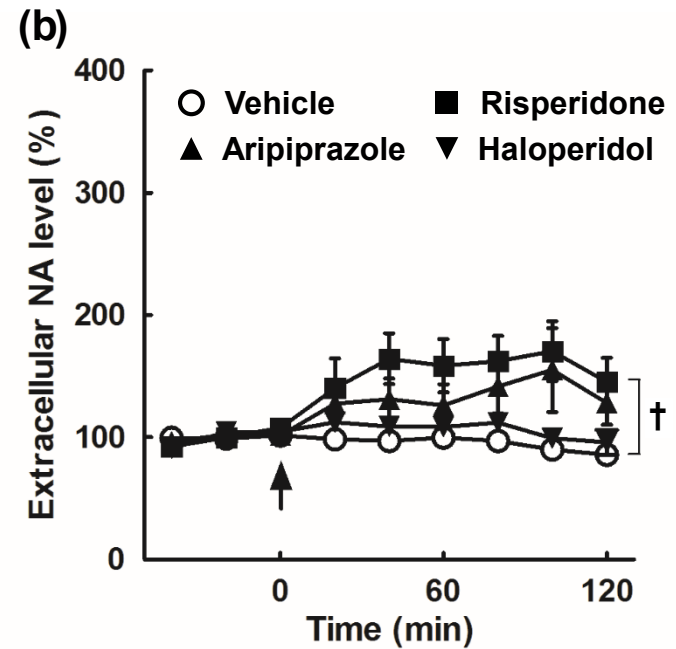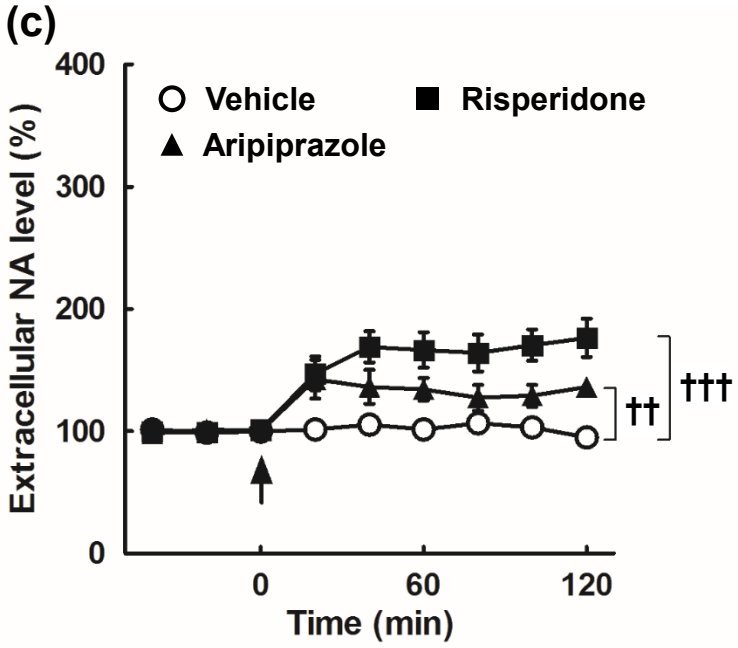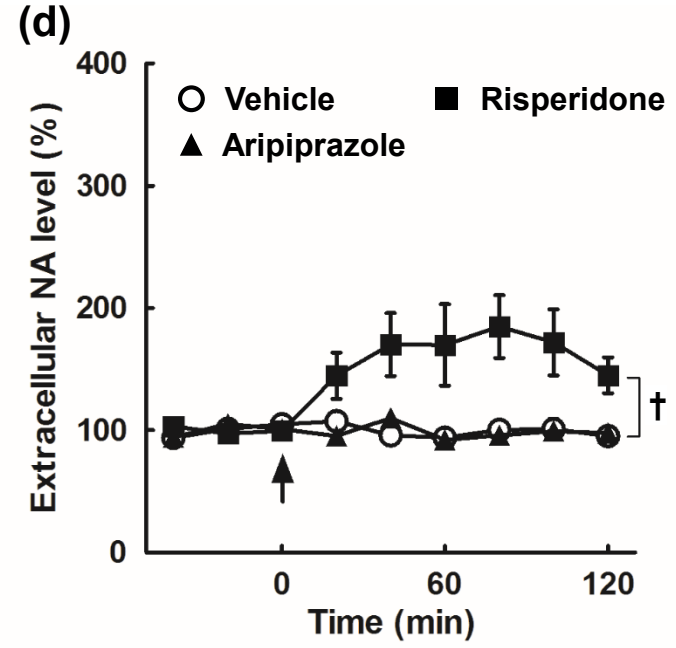

Hara et al., Supplementary Fig. 1

Supplement: 213_2017_4703_MOESM1_ESM.pdf [file 213_2017_4703_MOESM1_ESM.pdf]

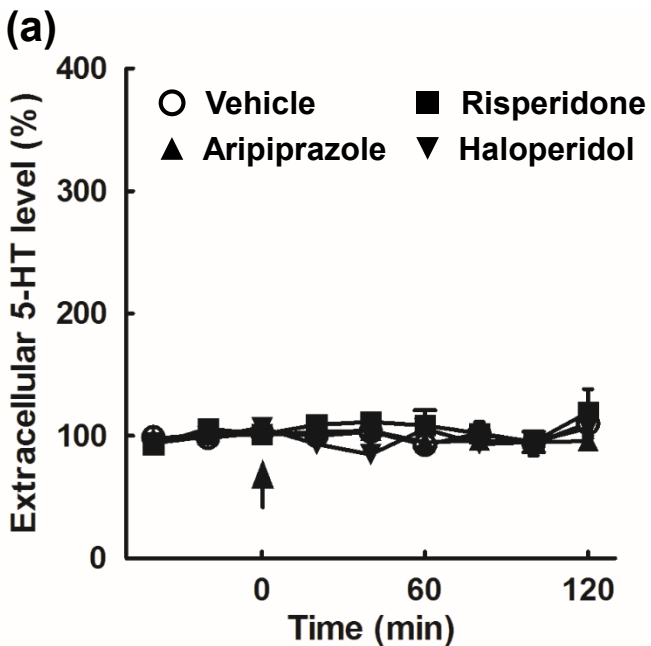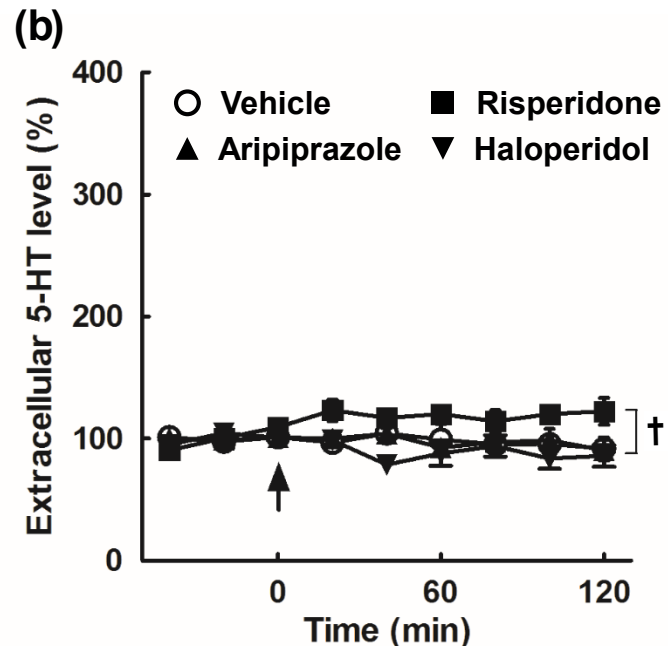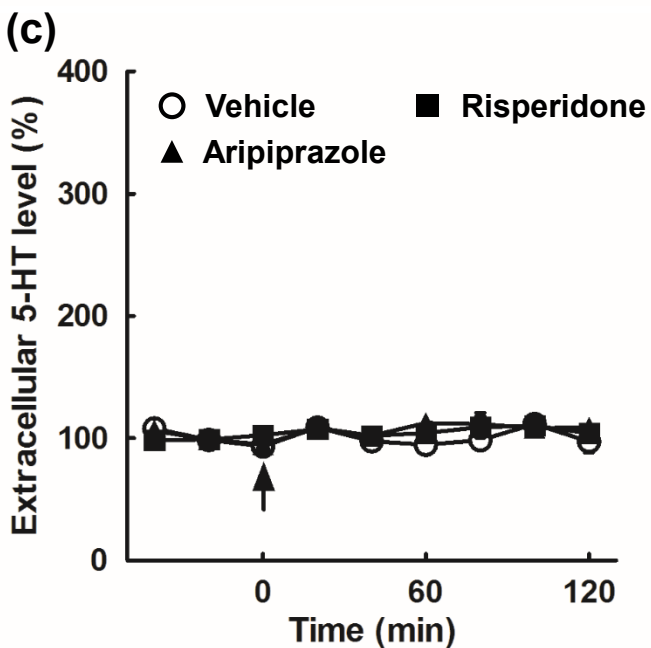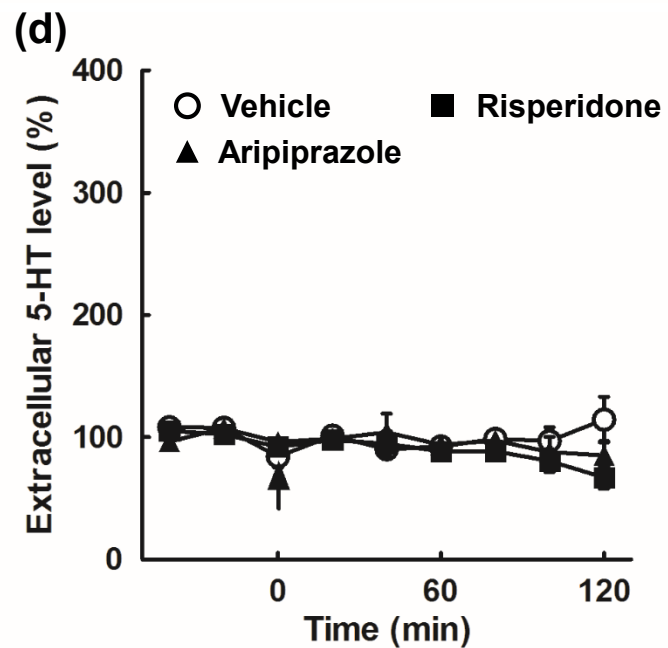

Supplement: 213_2017_4703_MOESM2_ESM.pdf [file 213_2017_4703_MOESM2_ESM.pdf]
